# Supplementary material for: Socioeconomic inequalities in newborn care during facility and home deliveries: a cross sectional analysis of data from demographic surveillance sites in rural Bangladesh, India and Nepal
Source: Springer Nature journal article supplement (doi:10.1186/s12939-018-0834-9), 2018-08-15
Supplement: MOESM1 [file 16039626]

Appendix 1.

Table 1. Missing data by newborn care practice.

|                                                                | Nepal(Dhanusha) |       | India |       | Nepal(Makwanpur) |       | Bangladesh |       |
|----------------------------------------------------------------|-----------------|-------|-------|-------|------------------|-------|------------|-------|
| Total number of observations                                   | 18,470          |       | 8,978 |       | 6,829            |       | 27,788     |       |
| Total number of missing observations (% of total observations) |                 |       |       |       |                  |       |            |       |
| Essential Newborn Care (ENC) score (sum of 9 practices)        | 9,859           | (53%) | 1,565 | (17%) | 5,010            | (73%) | 8,345      | (30%) |
| Hand washing by birth attendant (Washhands)                    | 8,075           | (44%) | 646   | (7%)  | 2,197            | (32%) | 6,028      | (22%) |
| Clean delivery kit used (CDK)                                  | 5,098           | (28%) | 101   | (1%)  | 2,010            | (29%) | 2,591      | (9%)  |
| Appropriate cord care (CordCare)                               | 4,060           | (22%) | 262   | (3%)  | 364              | (5%)  | 1,612      | (6%)  |
| Clean instrument used to cut cord (CordCut)                    | 3,782           | (20%) | 1,084 | (12%) | 3,069            | (45%) | 4,685      | (17%) |
| Wrapped within 5 mins (BabyWarm)                               | 3,683           | (20%) | 271   | (3%)  | 0                | (0%)  | 990        | (4%)  |
| Bathing after 6h (Bathing)                                     | 3,995           | (22%) | 313   | (3%)  | 0                | (0%)  | 1,104      | (4%)  |
| Breast feeding Initiated within 1h (Breast)                    | 1,192           | (6%)  | 286   | (3%)  | 55               | (1%)  | 1,052      | (4%)  |
| No prelacteal food (OnlyBreastMilk)                            | 1,003           | (5%)  | 261   | (3%)  | 0                | (0%)  | 976        | (4%)  |
| Postnatal visit on 1st day (PNCCChild_Day)                     | 160             | (1%)  | 4     | (0%)  | 0                | (0%)  | 22         | (0%)  |

Table 2 Missing data by newborn care practice for home deliveries without a skilled birth attendant

|                                                                | Nepal(Dhanusha) |       | India |      | Nepal(Makwanpur) |       | Bangladesh |       |
|----------------------------------------------------------------|-----------------|-------|-------|------|------------------|-------|------------|-------|
| Total number of observations                                   | 13,411          |       | 6,731 |      | 6,097            |       | 21,262     |       |
| Total number of missing observations (% of total observations) |                 |       |       |      |                  |       |            |       |
| Essential Newborn Care (ENC) score (sum of 9 practices)        | 5,711           | (43%) | 599   | (9%) | 4,515            | (74%) | 3,967      | (19%) |
| Hand washing by birth attendant (Washhands)                    | 4,239           | (32%) | 336   | (5%) | 1,968            | (32%) | 2,794      | (13%) |
| Clean delivery kit used (CDK)                                  | 1,537           | (11%) | 35    | (1%) | 1,694            | (28%) | 252        | (1%)  |
| Appropriate cord care (CordCare)                               | 623             | (5%)  | 152   | (2%) | 197              | (3%)  | 949        | (4%)  |
| Clean instrument used to cut cord (CordCut)                    | 396             | (3%)  | 260   | (4%) | 2,658            | (44%) | 834        | (4%)  |
| Wrapped within 5 mins (BabyWarm)                               | 468             | (3%)  | 150   | (2%) | 0                | (0%)  | 579        | (3%)  |
| Bathing after 6h (Bathing)                                     | 698             | (5%)  | 157   | (2%) | 0                | (0%)  | 665        | (3%)  |
| Breast feeding Initiated within 1h (Breast)                    | 689             | (5%)  | 167   | (2%) | 39               | (1%)  | 615        | (3%)  |
| No prelacteal food (OnlyBreastMilk)                            | 545             | (4%)  | 150   | (2%) | 0                | (0%)  | 588        | (3%)  |
| Postnatal visit on 1st day (PNCCChild_Day)                     | 89              | (1%)  | 1     | (0%) | 0                | (0%)  | 9          | (0%)  |

Appendix 1

Table 3 Missing data by newborn care practice for home deliveries with a skilled birth attendant

|                                                                | Nepal(Dhanusha) | India     | Nepal(Makwanpur) | Bangladesh |
|----------------------------------------------------------------|-----------------|-----------|------------------|------------|
| Total number of observations                                   | 334             | 377       | 59               | 1,097      |
| Total number of missing observations (% of total observations) |                 |           |                  |            |
| Essential Newborn Care (ENC) score (sum of 9 practices)        | 138 (41%)       | 106 (28%) | 29 (49%)         | 367 (33%)  |
| Hand washing by birth attendant (Washhands)                    | 88 (26%)        | 40 (11%)  | 8 (14%)          | 185 (17%)  |
| Clean delivery kit used (CDK)                                  | 66 (20%)        | 6 (2%)    | 17 (29%)         | 85 (8%)    |
| Appropriate cord care (CordCare)                               | 35 (10%)        | 30 (8%)   | 11 (19%)         | 81 (7%)    |
| Clean instrument used to cut cord (CordCut)                    | 26 (8%)         | 75 (20%)  | 17 (29%)         | 186 (17%)  |
| Wrapped within 5 mins (BabyWarm)                               | 25 (7%)         | 31 (8%)   | 0 (0%)           | 39 (4%)    |
| Bathing after 6h (Bathing)                                     | 38 (11%)        | 32 (8%)   | 0 (0%)           | 45 (4%)    |
| Breast feeding Initiated within 1h (Breast)                    | 26 (8%)         | 31 (8%)   | 2 (3%)           | 43 (4%)    |
| No prelacteal food (OnlyBreastMilk)                            | 29 (9%)         | 30 (8%)   | 0 (0%)           | 42 (4%)    |
| Postnatal visit on 1st day (PNCCChild_Day)                     | 8 (2%)          | 0 (0%)    | 0 (0%)           | 2 (0%)     |

Table 4 Missing data by newborn care practice for facility deliveries

|                                                                | Nepal(Dhanusha) | India     | Nepal(Makwanpur) | Bangladesh  |
|----------------------------------------------------------------|-----------------|-----------|------------------|-------------|
| Total number of observations                                   | 4,234           | 1,831     | 672              | 5,194       |
| Total number of missing observations (% of total observations) |                 |           |                  |             |
| Essential Newborn Care (ENC) score (sum of 9 practices)        | 3,705 (88%)     | 850 (46%) | 465 (69%)        | 3,920 (75%) |
| Hand washing by birth attendant (Washhands)                    | 3,530 (83%)     | 267 (15%) | 220 (33%)        | 3,000 (58%) |
| Clean delivery kit used (CDK)                                  | 3,338 (79%)     | 58 (3%)   | 298 (44%)        | 2,235 (43%) |
| Appropriate cord care (CordCare)                               | 3,261 (77%)     | 78 (4%)   | 155 (23%)        | 548 (11%)   |
| Clean instrument used to cut cord (CordCut)                    | 3,253 (77%)     | 742 (41%) | 393 (58%)        | 3,610 (70%) |
| Wrapped within 5 mins (BabyWarm)                               | 3,099 (73%)     | 88 (5%)   | 0 (0%)           | 352 (7%)    |
| Bathing after 6h (Bathing)                                     | 3,149 (74%)     | 120 (7%)  | 0 (0%)           | 372 (7%)    |
| Breast feeding Initiated within 1h (Breast)                    | 411 (10%)       | 86 (5%)   | 13 (2%)          | 374 (7%)    |
| No prelacteal food (OnlyBreastMilk)                            | 375 (9%)        | 79 (4%)   | 0 (0%)           | 326 (6%)    |
| Postnatal visit on 1st day (PNCCChild_Day)                     | 51 (1%)         | 3 (0%)    | 0 (0%)           | 11 (0%)     |
