# Supplementary material for: Socioeconomic inequalities in newborn care during facility and home deliveries: a cross sectional analysis of data from demographic surveillance sites in rural Bangladesh, India and Nepal
Source: Springer Nature journal article supplement (doi:10.1186/s12939-018-0834-9), 2018-08-15
Supplement: MOESM2 [file 16039626]

### Appendix 3

Table 3. Complete case analysis: The distribution (%) of literacy, delivery type and delivery type by literacy in the population of the study sites.

|                                                       | Ekjut                | PCP                  | Dhanusha             | Makwanpur            |
|-------------------------------------------------------|----------------------|----------------------|----------------------|----------------------|
| Number of deliveries                                  | 8720                 | 26835                | 17835                | 6688                 |
| <i>Literacy</i>                                       |                      |                      |                      |                      |
| Illiterate (%)                                        | 68%                  | 34%                  | 76%                  | 66%                  |
| Literate (%)                                          | 32%                  | 66%                  | 24%                  | 34%                  |
| <i>Delivery Type</i>                                  |                      |                      |                      |                      |
| Home (%)                                              | 78%                  | 80%                  | 78%                  | 97%                  |
| Home + SBA (%)                                        | 4%                   | 3%                   | 1%                   | 0%                   |
| Institutional (%)                                     | 19%                  | 17%                  | 21%                  | 2%                   |
| <i>Delivery type by literacy</i>                      |                      |                      |                      |                      |
| <i>Literate</i>                                       |                      |                      |                      |                      |
| Home (%)                                              | 61%                  | 76%                  | 63%                  | 95%                  |
| Home + SBA (%)                                        | 5%                   | 3%                   | 1%                   | 1%                   |
| Institutional (%)                                     | 34%                  | 21%                  | 35%                  | 5%                   |
| <i>Illiterate</i>                                     |                      |                      |                      |                      |
| Home (%)                                              | 85%                  | 89%                  | 83%                  | 99%                  |
| Home + SBA (%)                                        | 3%                   | 2%                   | 1%                   | 0%                   |
| Institutional (%)                                     | 12%                  | 8%                   | 16%                  | 1%                   |
| OR facility delivery literate vs. Illiterate (95% CI) | 3.94 ( 3.49 - 4.45 ) | 3.05 ( 2.80 - 3.32 ) | 2.89 ( 2.65 - 3.16 ) | 4.31 ( 3.50 - 5.32 ) |
| OR home with SBA literate vs. Illiterate (95% CI)     | 2.73 ( 2.16 - 3.44 ) | 1.46 ( 1.27 - 1.68 ) | 2.28 ( 1.74 - 2.98 ) | 3.38 ( 1.85 - 6.18 ) |

Appendix 3

Table 5. Complete case analysis: A univariable model of the effect of literacy on newborn care score.

|                       | <i>India</i><br><i>beta</i> (95% CI) | <i>Bangladesh</i><br><i>beta</i> (95% CI) | <i>Nepal (Dhanusha)</i><br><i>beta</i> (95% CI) | <i>Nepal (Makwanpur)</i><br><i>beta</i> (95% CI) |
|-----------------------|--------------------------------------|-------------------------------------------|-------------------------------------------------|--------------------------------------------------|
| Literate              | 0.59 ( 0.53 - 0.66 )                 | 0.29 ( 0.25 - 0.33 )                      | 0.51 ( 0.44 - 0.59 )                            | 0.45 ( 0.30 - 0.59 )                             |
| Constant (illiterate) | 3.77 ( 3.52 - 4.02 )                 | 4.86 ( 4.54 - 5.17 )                      | 3.20 ( 3.03 - 3.37 )                            | 3.91 ( 3.67 - 4.15 )                             |

Appendix 3

Table 7. Complete case analysis: A multivariable model of the effect of literacy and delivery type on newborn care score including interaction.

|                                 | India<br>beta (95% CI) | Bangladesh<br>beta (95% CI) | Nepal (Dhanusha)<br>beta (95% CI) | Nepal (Makwanpur)<br>beta (95% CI) |
|---------------------------------|------------------------|-----------------------------|-----------------------------------|------------------------------------|
| Literate                        | 0.27 ( 0.20 - 0.35 )   | 0.22 ( 0.18 - 0.26 )        | 0.41 ( 0.34 - 0.49 )              | 0.44 ( 0.30 - 0.58 )               |
| Home + SBA                      | 1.06 ( 0.85 - 1.26 )   | 0.65 ( 0.49 - 0.82 )        | 1.13 ( 0.86 - 1.39 )              | 0.87 ( 0.04 - 1.70 )               |
| Institutional                   | 1.12 ( 1.00 - 1.23 )   | 1.63 ( 1.45 - 1.80 )        | 1.72 ( 1.55 - 1.89 )              | 2.36 ( 1.96 - 2.77 )               |
| Home + SBA*literate             | 0.21 ( -0.07 - 0.50 )  | 0.01 ( -0.20 - 0.21 )       | 0.05 ( -0.37 - 0.46 )             | 1.04 ( 0.03 - 2.05 )               |
| Institutional*literate          | 0.34 ( 0.18 - 0.51 )   | -0.11 ( -0.31 - 0.08 )      | -0.07 ( -0.33 - 0.19 )            | -0.60 ( -1.04 - -0.17 )            |
| Constant (Home-SBA, illiterate) | 3.63 ( 3.38 - 3.87 )   | 4.77 ( 4.47 - 5.08 )        | 3.09 ( 2.92 - 3.26 )              | 3.76 ( 3.56 - 3.97 )               |
